# Supplementary material
Source: Springer Nature journal article supplement (https://www.springermedizin.de/resource/supplementary/13069_2014_152_MOESM1_ESM.pdf/9659892)

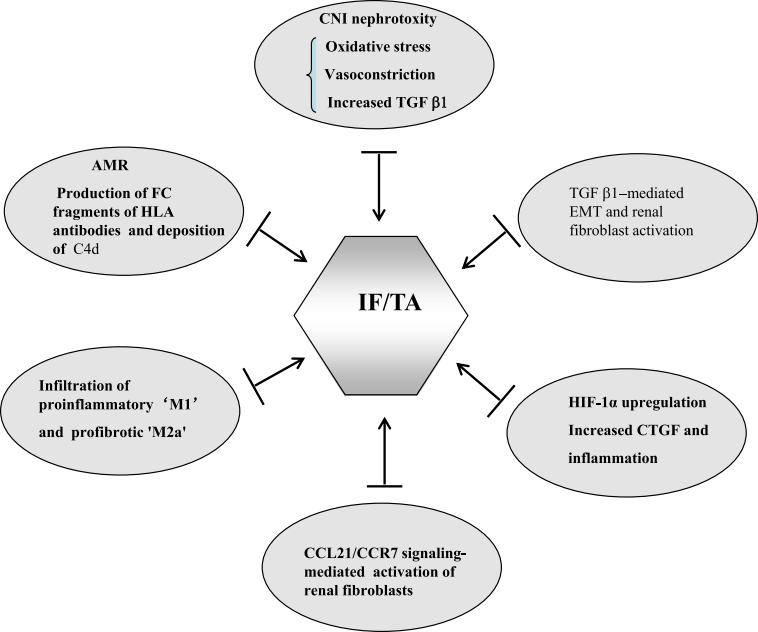

Supplement: MOESM1 [file 9659892]
